# Supplementary material
Source: HighWire-hosted journal article supplement (https://rc.rcjournal.com/highwire/filestream/23984/field_highwire_adjunct_files/0/rc-10241-File004.pdf)
Supplement: rc-10241-File004.pdf [file rc-10241-File004.pdf]

How often do you clean the mask?

- Every day
- 1 time a week
- 2 times a week
- 3-6 times a week
- 1 time a month
- Less than 1 time a month
- Never

What do you use to clean the mask?

- Water
- Soap and water
- Vinegar
- Wipes
- Automatic sterilizer
- Other - please explain

What type of water do you use to clean the mask?

- Tap water
- Sterile water
- Distilled water
- Well water
- Bottled water
- Boiled water
- Other - please explain

How often do you replace the mask with a new one?

- Every 3 months
- Every 6 months
- Once a year
- Never
- Other

How often do you clean the tubing?

- Every day
- 1 time a week
- 2 times a week
- 3-6 times a week
- 1 time a month
- Less than 1 time a month
- Never

What do you use to clean the tubing?

- Water
- Soap and water
- Vinegar
- Wipes
- Automatic sterilizer
- Other - please explain

What type of water do you use to clean the tubing?

- Tap water
- Sterile water
- Distilled water
- Well water
- Bottled water
- Boiled water
- Other - please explain

How often do you replace the tubing with a new one?

- Every 3 months
- Every 6 months
- Once a year
- Never
- Other - please explain

How often do you clean the water chamber?

- Every day
- 1 time a week
- 2 times a week
- 3-6 times a week
- 1 time a month
- Less than 1 time a month
- Never

What do you use to clean the water chamber?

- Water
- Soap and water
- Vinegar
- Wipes
- Automatic sterilizer
- Other - please explain

What type of water do you use to clean the chamber?

- Tap water
- Sterile water
- Distilled water
- Well water
- Bottled water
- Boiled water
- Other - please explain

How often do you empty the water from the water chamber?

- Every day
- Weekly
- Other - please explain
- I do not empty the chamber because I add new water when needed
- Do not use water chamber

What type of water do you use in the water chamber?

- Tap water
- Sterile water
- Distilled water
- Well water
- Bottled water
- Boiled water
- Do not use water in chamber
- Other - please explain

Does the machine have a washable or disposable filter?

- Washable (foam, gray or white)
- Disposable (flat and white)
- Don't know

How often is the washable filter washed?

- Daily
- Weekly
- Monthly
- Never
- Other

How often is the washable filter replaced?

- Every 6 months
- Never
- Other

How often is the disposable filter changed?

- Every 6 months
- Never
- Other

Since using a CPAP or Bi-level device, have respiratory symptoms such as congestion, coughing, sneezing, runny nose or sinus problems started or happened more often?

- Yes
- No
- Not sure

What type of respiratory symptoms have occurred since starting the CPAP or Bi-level device?  
Select all that apply.

- Congestion
- Runny nose
- Sneezing
- Coughing
- Sinus problems
- Other - please explain

Who taught you how to clean the mask, tubing, water chamber and filter? Select all that apply.

- Sleep clinic doctor
- Sleep clinic nurse practitioner (APN or APRN)
- Sleep clinic respiratory therapist
- Home equipment company
- Other - please explain

What is the insurance provider for the child or young adult that uses the equipment?

- Medicaid
- ARKids
- Commercial insurance such as Blue Cross, Aetna, United Healthcare, or similar
- Tri-Care
- No insurance / self-pay
- Other - please provide name

What is the age of the child or young adult who uses the CPAP or Bi-level device?

What is the sex of the child or young adult who uses the CPAP or Bi-level device?

- Male
- Female
- Other

Ethnicity of the child or young adult who uses the CPAP or Bi-level device:

- White non-Hispanic
- White Hispanic
- Black non-Hispanic
- Black Hispanic
- Hispanic/Latino
- Asian
- Pacific Islander
- Native American
- Multiracial
- Other
- Prefer not to answer
- Other ethnicity

Approximately how long has the child or young adult used the CPAP or Bi-level device at home?

Who is responsible for cleaning the equipment?

- The child or young adult who uses the equipment
- Parent or guardian
- Sibling
- Don't know / not sure
- Other - please explain

How do you prefer to receive information about cleaning the equipment? Select all that apply.

- Written
- Verbal
- Video
- Other

How often do you prefer to receive information about cleaning the equipment?

- Every visit
- When first set up with equipment
- If requested
- Once a year
- Other

Person who completed the survey:

- Young adult who uses the equipment at home
- Parent or legal guardian
